# Supplementary material for: A novel dansyl-appended bile acid receptor for preferential recognition of Hg2+
Source: Royal Society of Chemistry journal article supplement (doi:10.1039/c4ra02460e), 2014-01-01
Supplement: c4ra02460e1.pdf [file c4ra02460e1.pdf]

ELECTRONIC SUPPLEMENTARY INFORMATION (ESI)

**A Novel Dansyl Appended Bile Acid Receptor for  
Preferential Recognition of Hg<sup>2+</sup>**

Pradeep K. Muwal, Shubha Pandey and Pramod S. Pandey\*

*Department of Chemistry, Indian Institute of Technology Delhi, Hauz Khas,  
New Delhi 110016, India.*

\* To whom the correspondence should be addressed.

*E-mail: [pramod@chemistry.iitd.ac.in](mailto:pramod@chemistry.iitd.ac.in) (PS Pandey); Tel: +91 11 26591506;*

*Fax: +91 11 26582037*

---

**Table of contents**

|                                                                                           | <b>Page No.</b> |
|-------------------------------------------------------------------------------------------|-----------------|
| Synthesis of the compound <b>4</b> and <b>5</b>                                           | 3               |
| Characterization of compound <b>5</b>                                                     | 3-4             |
| <sup>1</sup> H and <sup>13</sup> C NMR of Compound <b>5</b>                               | 4               |
| Mass Spectrum of <b>5</b>                                                                 | 5               |
| Calibration plot for the detection limit                                                  | 5               |
| Change in Uv-vis spectra of <b>5</b> in the presence of Cu <sup>2+</sup>                  | 6               |
| Competitive experiment of <b>5</b> in the presence of Hg <sup>2+</sup> + other metal ions | 7               |
| Calibration plot showing stoichiometry and binding constant                               | 8               |

**General Synthesis:**

Compounds **1** and **2** were synthesized according to the reported literature procedures.<sup>1</sup> The propargyl dansyl amide (**4**) was synthesized by the reaction of dansyl-chloride with propargyl amine in the presence of triethylamine in dichloromethane according to the literature procedure.<sup>2</sup> Afterwards receptor **5** was synthesized by the coupling of diazido derivative of deoxycholic acid (**2**) with propargyl dansyl amide (**4**) using click reaction.

1. (a) Kumar, A.; Pandey, *tetrahedron Lett.* **2009**, *50*, 5842-5845. (b) Chhatra, R. K.; Kumar, A.; Pandey, P. S. *J.Org. Chem.* **2011**, *76*, 9086.
2. Sarez, A. I.; Braden, M. R.; Gerdes, J. M.; Thompson, C. M. *Bioorg. Med. Chem. Letts.* **2010**, *20*, 194.

### Synthesis of compound **5**:

To a solution of 3 $\beta$ , 12 $\beta$ -bis-(azidoacetyl)deoxycholate (**2**) (800 mg, 1.39 mmol) in 80 ml of *t*-BuOH, propargyl dansylamide (**4**) (845 mg, 2.93 mmol) was added. To this solution, CuSO<sub>4</sub>·5H<sub>2</sub>O (10 mol %) and sodium ascorbate (20 mol %) were added in 8.0 ml of H<sub>2</sub>O. This reaction mixture was stirred at 50 °C for 10 hours followed by evaporation under vacuum. The residue was dissolved in 50 ml of CHCl<sub>3</sub> and washed with H<sub>2</sub>O (40 ml) twice. Afterwards chloroform layer was dried over anhydrous Na<sub>2</sub>SO<sub>4</sub>, filtered and evaporated completely. The crude product was purified by column chromatography over basic alumina (2% methanol in chloroform) to give pure **5**. Yield: 80 %, **M.P.**: 70-71 °C.

<sup>1</sup>H NMR (300 MHz, CDCl<sub>3</sub>, TMS)  $\delta$  0.69 (s, 3H, 18-Me), 0.80 (d, 3H,  $J$  = 5.1 Hz, 21-Me), 0.91 (s, 3H, 19-Me), 0.95-2.32 (26H, steroidal H), 2.88 (6H, -NCH<sub>3</sub>  $\times$  6), 3.67 (s, 3H, -OCH<sub>3</sub>), 4.14 (s, 2H, -NHCH<sub>2</sub>), 4.25 (s, 2H, -NHCH<sub>2</sub>), 4.70 (m, 1H, 3 $\beta$ -H), 5.07-5.29 (m, 5H, 12 $\beta$ -H, -OCOCH<sub>2</sub>  $\times$  2), 6.03 (b, 2H, -NH  $\times$  2), 7.14 (1H, Ar-H), 7.17 (1H, Ar-H), 7.51 (m, 4H, Ar-H), 7.68 (2H, Triazole-H), 8.26 (m, 4H, Ar-H), 8.11 (d, 1H,  $J$  = 6.0 Hz, Ar-H), 8.5 (d, 1H,  $J$  = 7.2, Ar-H); <sup>13</sup>C NMR (300 MHz, CDCl<sub>3</sub>, TMS)  $\delta$  12.14, 14.05, 17.56, 22.69, 23.20, 25.12, 25.73, 25.86, 26.50, 27.12, 28.88, 29.08, 29.28, 29.43, 29.54, 29.61, 30.67, 30.69, 30.90, 31.42, 31.57, 31.85, 33.73, 33.90, 34.49, 34.57, 35.29, 38.49, 38.50, 41.51, 44.96, 45.35, 47.27, 49.16, 51.26, 51.50, 76.88, 77.21, 78.39, 113.99, 115.22, 115.25, 123.11, 128.42, 129.29, 129.37, 129.48, 129.53, 129.76, 129.81, 130.41, 134.58, 134.73, 139.18, 151.78, 165.25, 165.76, 174.69.

**IR**  $\nu_{\max}$  (KBr) 3447.92, 2930.92, 2867.81, 1741.04, 1636.46, 1456.64, 1326.58, 1224.24, 1144.88 cm<sup>-1</sup>.

HRMS (ESI, MS)  $m/z$ : calcd for  $C_{59}H_{76}N_{10}O_{10}NaS_2$  1171.5085, found 1171.5087, (M + Na).

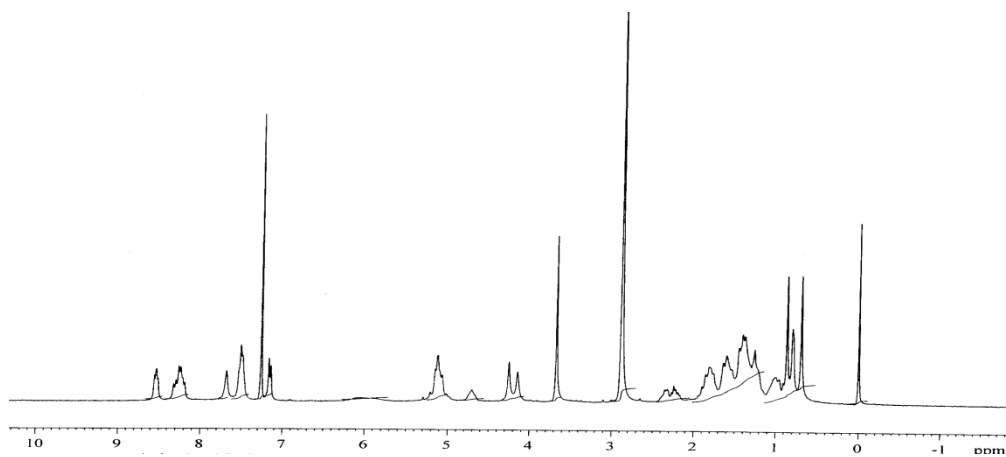

**Figure S1a:**  $^1H$  NMR (300 MHz,  $CDCl_3$ ,  $\delta$  in ppm) spectrum of compound **5**.

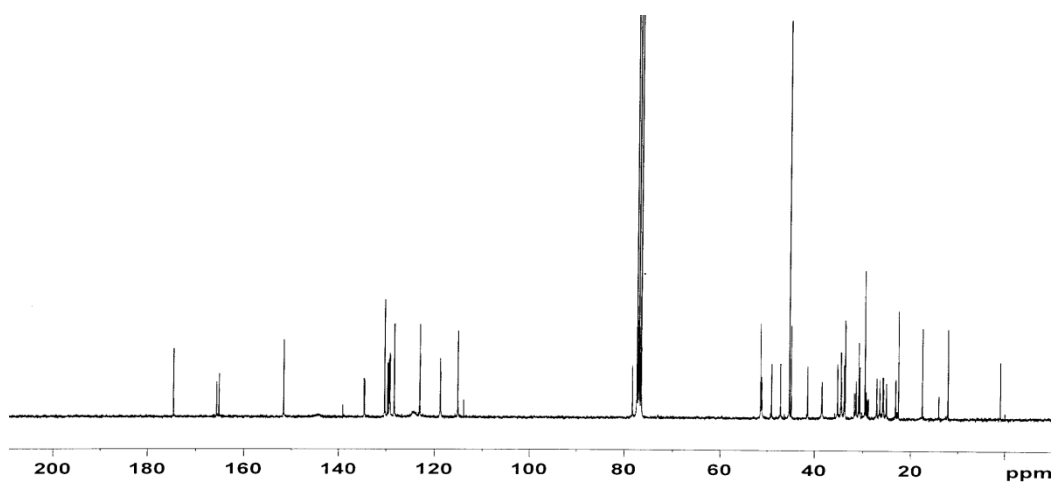

**Figure S1b:**  $^{13}C$  NMR spectrum of compound **5**.

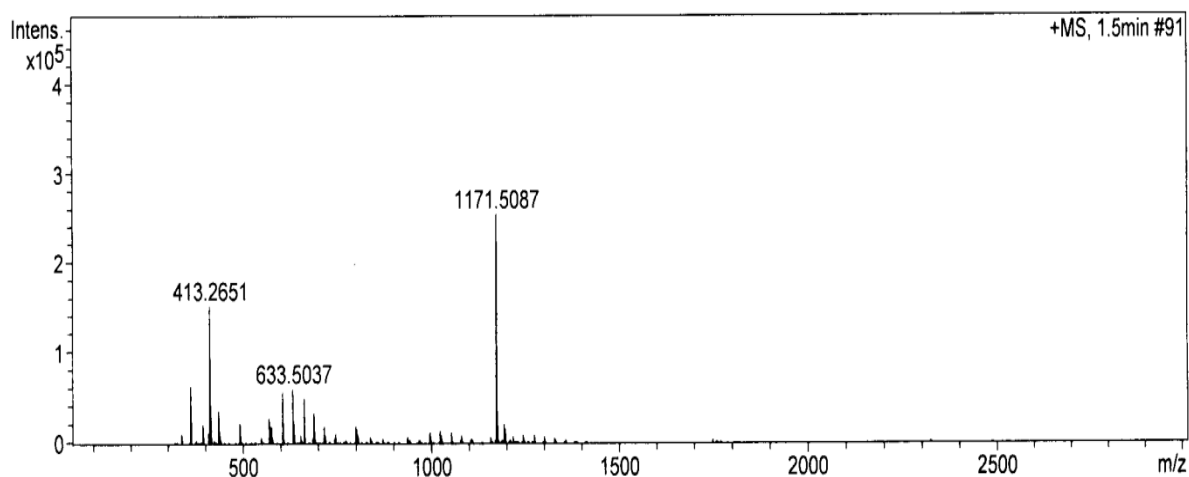

**Figure S2:** Mass spectrum of compound 5.

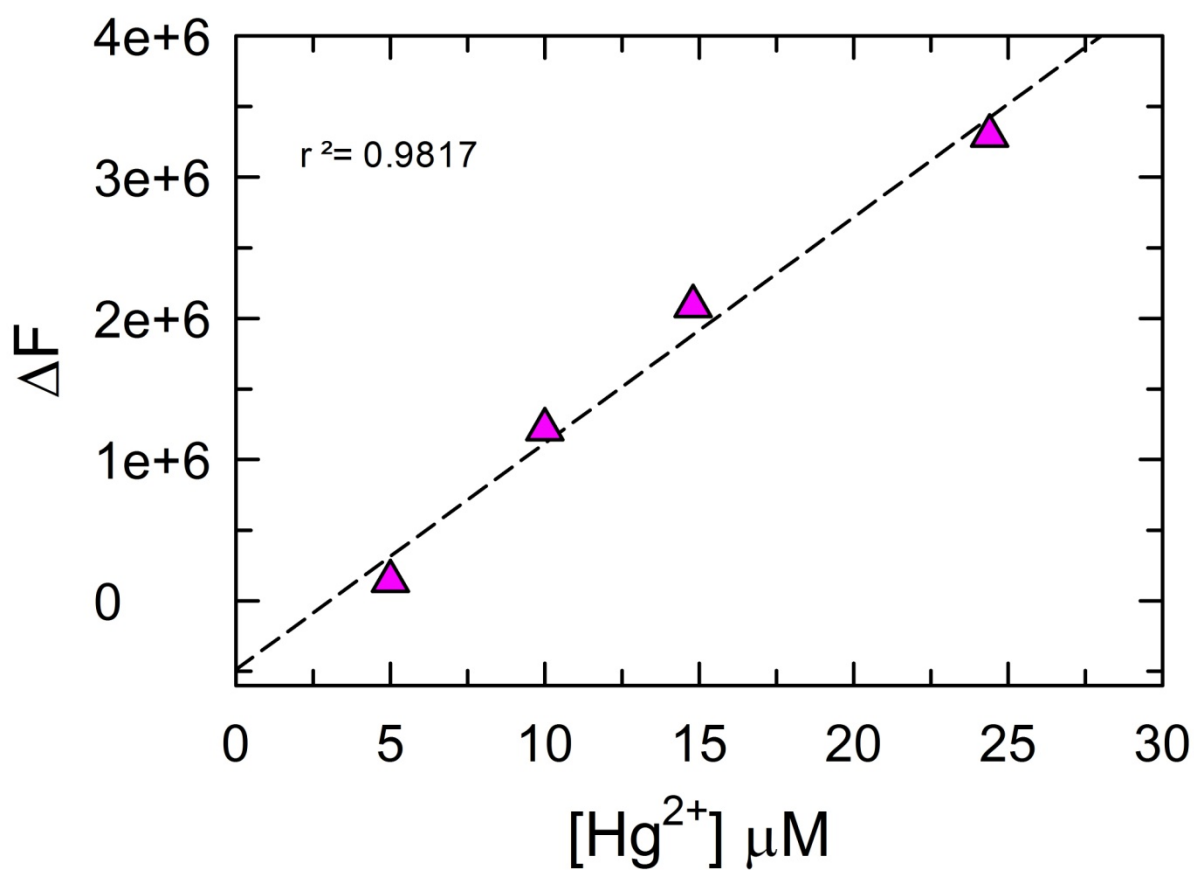

**Figure S3.** Change in fluorescence intensity of 5 upon addition of  $\text{Hg}^{2+}$  for  $0 \leq [\text{Hg}^{2+}] \leq 25 \mu\text{M}$  (calibration plot for the calculation of detection limit).

### Detection Limit:

Fluorescence intensity of **5** was varied linearly with  $[\text{Hg}^{2+}]$  upto  $25\mu\text{M}$  and limit of detection for  $\text{Hg}^{2+}$  by **5** could be calculated by using calibration sensitivity ( $m$ ) of relative fluorescence intensity versus  $[\text{Hg}^{2+}]$  in the aforementioned range. To calculate LOD, minimum change in the fluorescence intensity due to the presence of  $[\text{Hg}^{2+}]$  was taken to be  $3 \times s_0$  where  $s_0$  represents standard deviation of  $F_0$  for 12 replicate measurements. Thus, the LOD is calculated using the formula  $\text{LOD } [\text{Hg}^{2+}] = 3 \times s_0 / m$ , and it was found to be  $\sim 2 \mu\text{M}$ .

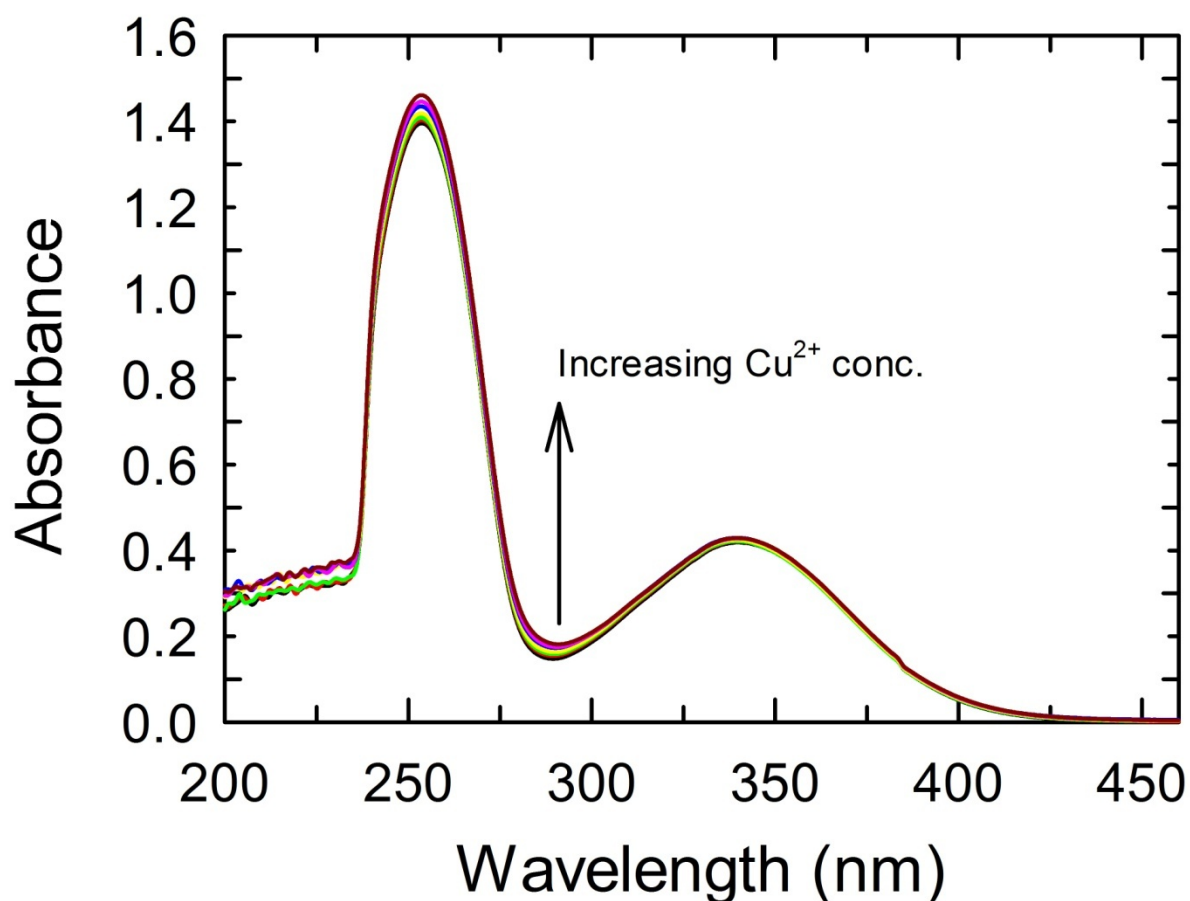

**Fig S4.** Change in UV-Vis spectra of receptor **5** ( $100 \mu\text{M}$ ) upon addition of  $\text{Cu}^{2+}$  in  $\text{CHCl}_3:\text{MeOH}$  (7:3, v/v).

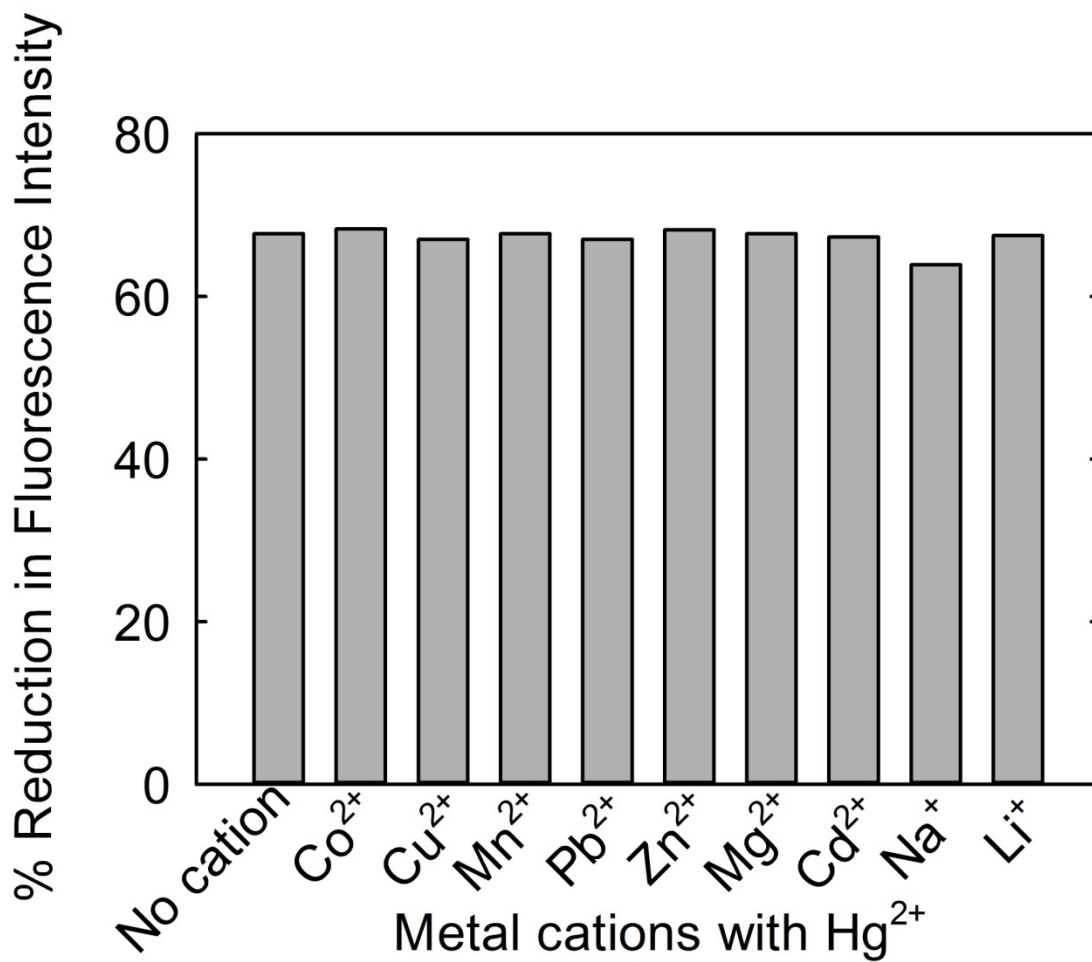

**Fig S5.** % reduction in the fluorescence intensity of **5** (25  $\mu\text{M}$ ) in the presence of 100  $\mu\text{M}$  each of  $\text{M}_n^+$  and  $\text{Hg}^{2+}$  in  $\text{CHCl}_3:\text{MeOH}$  (7:3, v/v) at ambient conditions ( $\lambda_{\text{excitation}} = 351 \text{ nm}$ ).

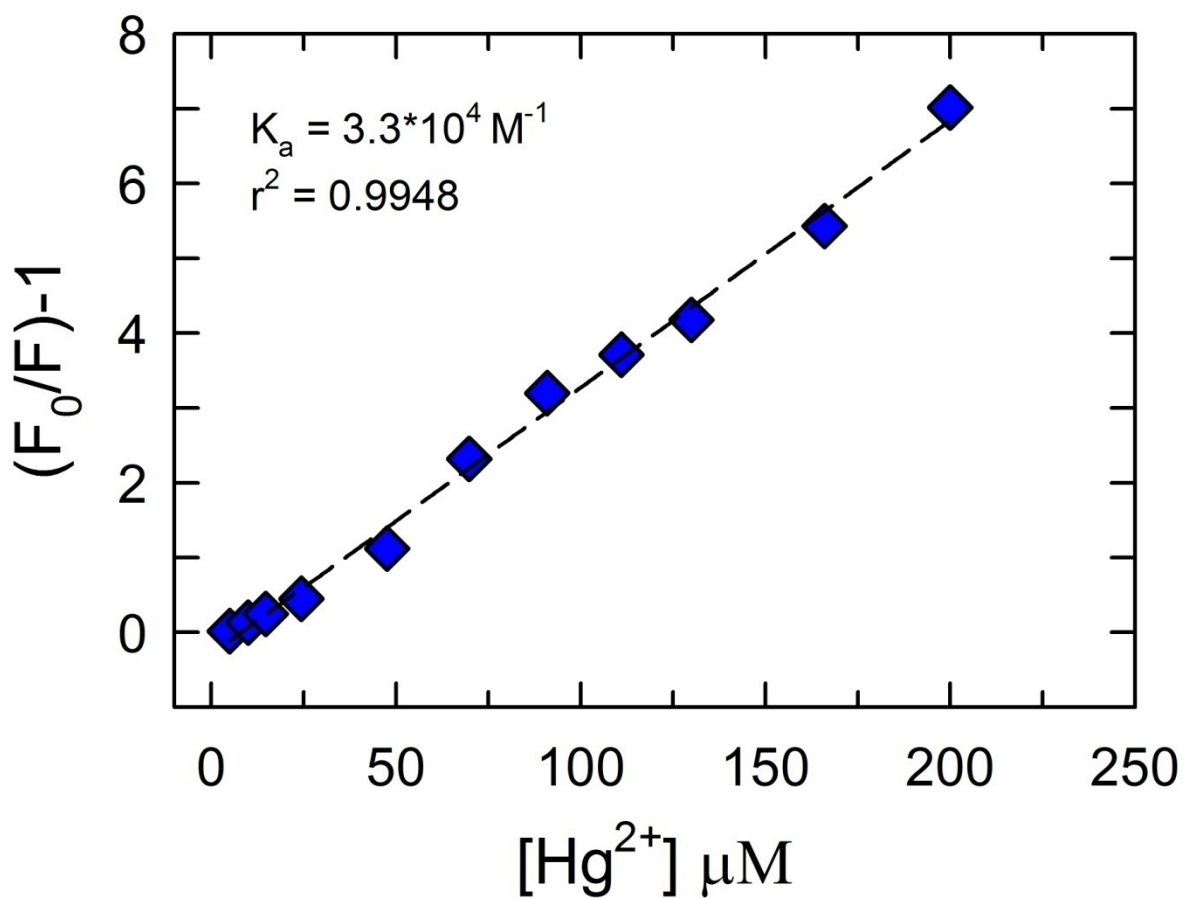

**Figure S6.** Change in fluorescence upon addition of  $\text{Hg}^{2+}$  for  $0 \leq [\text{Hg}] \leq 200 \mu\text{M}$ .
